# Supplementary figures and images for: Azobenzene derivatives with a long alkyl chain and aminoxyls
Source: Royal Society of Chemistry journal article supplement (doi:10.1039/b408432b), 2004-01-01

# Crystal Structure of Azobenzene Derivative with PROXYL

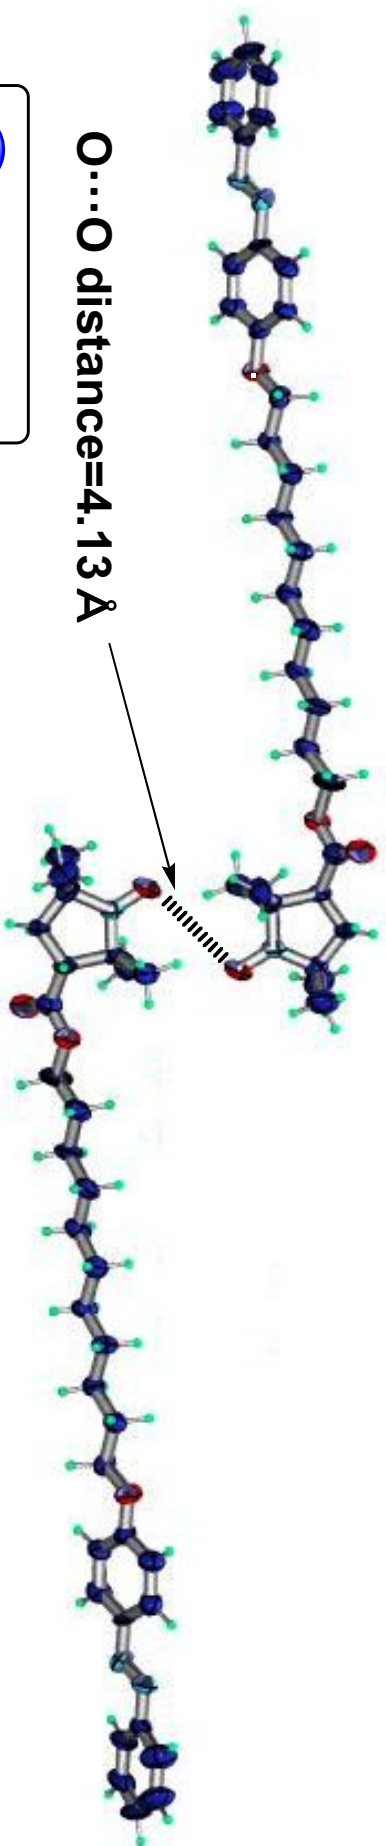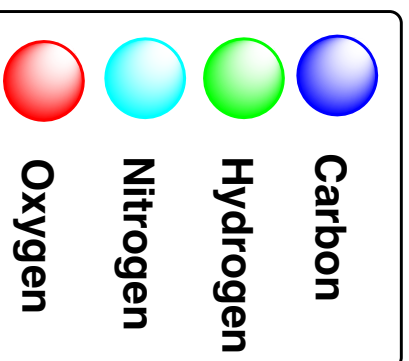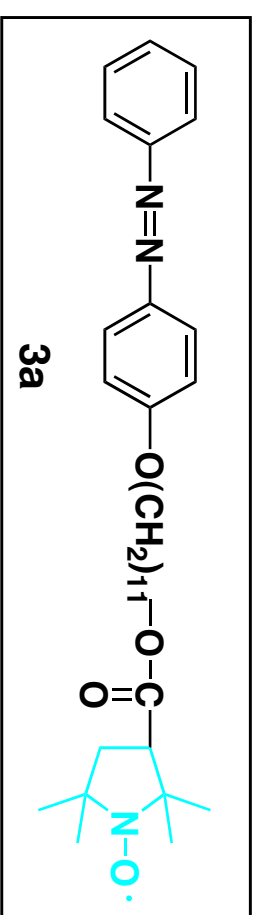

Supplement: sifig3a.pdf [file sifig3a.pdf]

# Crystal Structure of Azobenzene Derivative with TEMPO

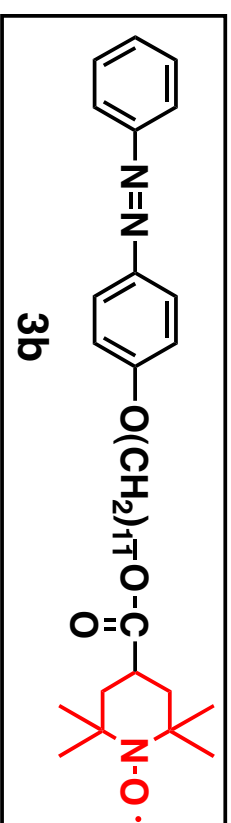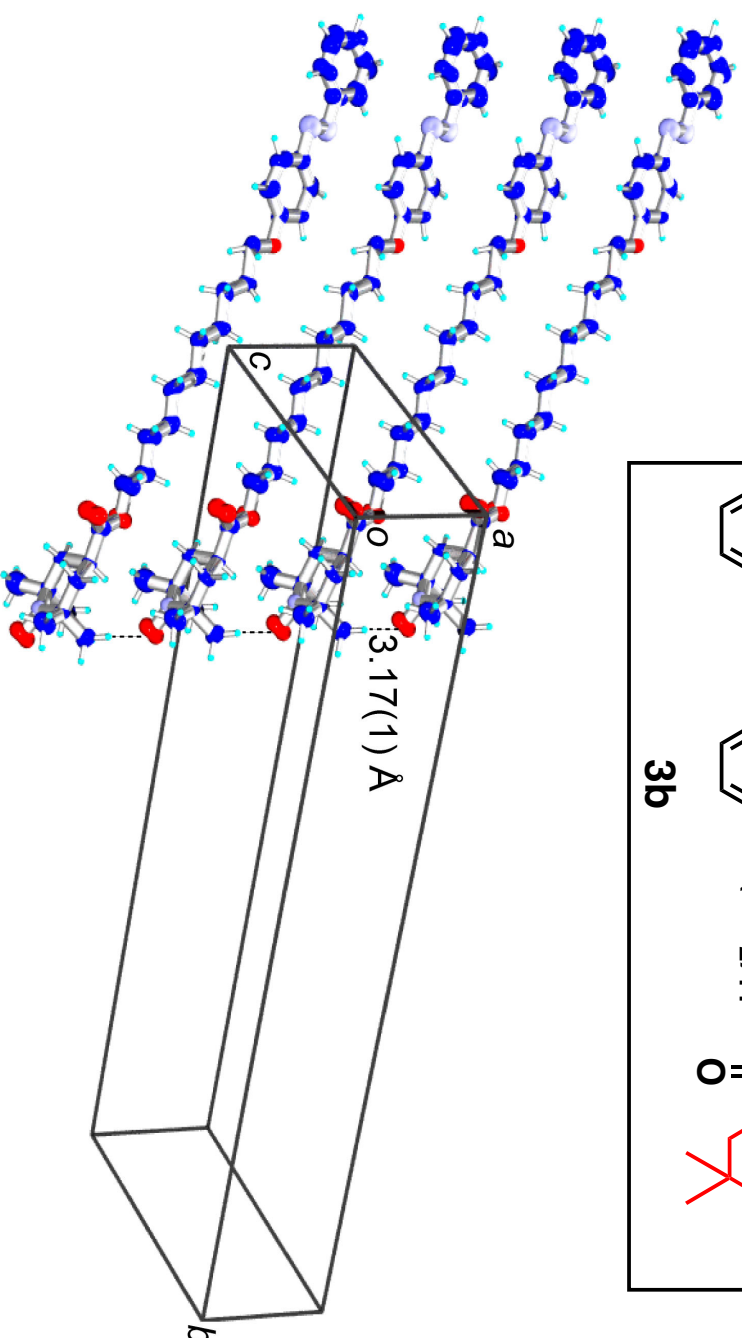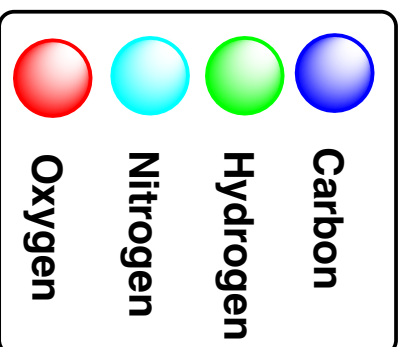

Supplement: sifig3b.pdf [file sifig3b.pdf]
